# Supplementary material for: Analysis of the Potential Range of Anticlea sibirica L. (Kunth) and Its Changes under Moderate Climate Change in the 21st Century
Source: MDPI journal article supplement (doi:10.3390/plants11233270), 2022-11-28
Supplement: s1 [file s1]

**Table S1.** The estimates of relative contributions of the environmental variables to the MaxEnt model.

| Code/Unit                      | Variable                                                 | Percent contribution | Permutation importance |
|--------------------------------|----------------------------------------------------------|----------------------|------------------------|
| <b>bio4 (°C)</b>               | <b>Temperature Seasonality</b>                           | <b>22.6</b>          | <b>9.7</b>             |
| <b>h<sub>max-min</sub> (m)</b> | <b>Difference between maximum and mini-mum elevation</b> | <b>19</b>            | <b>10.7</b>            |
| <b>bio18 (mm)</b>              | <b>Precipitation of Warmest Quarter</b>                  | <b>12.5</b>          | <b>9.5</b>             |
| <b>bio2 (°C)</b>               | <b>Mean Diurnal Range</b>                                | <b>8.6</b>           | <b>26.7</b>            |
| <b>bio9 (°C)</b>               | <b>Mean Temperature of Driest Quarter</b>                | <b>8.4</b>           | <b>4.6</b>             |
| bio11 (°C)                     | Mean Temperature of Coldest Quarter                      | <b>7.2</b>           | <b>11.9</b>            |
| bio3 (%)                       | Isothermality                                            | 6.6                  | 2                      |
| <b>bio15 (CV)</b>              | <b>Precipitation Seasonality</b>                         | <b>2.7</b>           | <b>3.4</b>             |
| bio12 (mm)                     | Annual Precipitation                                     | <b>2.7</b>           | 1.6                    |
| bio19 (mm)                     | Precipitation of Coldest Quarter                         | 2                    | 0.7                    |
| bio7 (°C)                      | Temperature Annual Range                                 | 2                    | 2.5                    |
| <b>bio10 (°C)</b>              | <b>Mean Temperature of Warmest Quarter</b>               | <b>1.9</b>           | <b>3.6</b>             |
| bio16 (mm)                     | Precipitation of Wettest Quarter                         | 1.2                  | 6.2                    |
| bio1 (°C)                      | Annual Mean Temperature                                  | 0.7                  | <b>3</b>               |
| bio8 (°C)                      | Mean Temperature of Wettest Quarter                      | 0.7                  | 1.8                    |
| bio6 (°C)                      | Min Temperature of Coldest Month                         | 0.6                  | 0.1                    |
| bio5 (°C)                      | Max Temperature of Warmest Month                         | 0.3                  | 0.7                    |
| bio14 (mm)                     | Precipitation of Driest Month                            | 0.2                  | 1.1                    |
| bio17 (mm)                     | Precipitation of Driest Quarter                          | 0.1                  | 0                      |

|                       |                                |     |     |
|-----------------------|--------------------------------|-----|-----|
| bio13 (mm)            | Precipitation of Wettest Month | 0.1 | 0   |
| h <sub>Mean</sub> (m) | Altitude <sub>Mean</sub>       | 0   | 0.1 |

---

Note: Ecological predictors left after removal of predictors with high pair correlation are marked in bold.

**Table S2.** Correlation analysis of the environmental variables.

|       | bio1  | bio2  | bio3  | bio4  | bio5  | bio6  | bio7  | bio8  | bio9  | bio10 | bio11 | bio12 | bio13 | bio14 | bio15 | bio16 | bio17 | bio18 | bio19 | h <sub>mean</sub> |
|-------|-------|-------|-------|-------|-------|-------|-------|-------|-------|-------|-------|-------|-------|-------|-------|-------|-------|-------|-------|-------------------|
| bio1  |       |       |       |       |       |       |       |       |       |       |       |       |       |       |       |       |       |       |       |                   |
| bio2  | 0,54  |       |       |       |       |       |       |       |       |       |       |       |       |       |       |       |       |       |       |                   |
| bio3  | 0,77  | 0,83  |       |       |       |       |       |       |       |       |       |       |       |       |       |       |       |       |       |                   |
| bio4  | -0,76 | -0,44 | -0,84 |       |       |       |       |       |       |       |       |       |       |       |       |       |       |       |       |                   |
| bio5  | 0,81  | 0,42  | 0,41  | -0,26 |       |       |       |       |       |       |       |       |       |       |       |       |       |       |       |                   |
| bio6  | 0,95  | 0,38  | 0,74  | -0,86 | 0,68  |       |       |       |       |       |       |       |       |       |       |       |       |       |       |                   |
| bio7  | -0,69 | -0,20 | -0,70 | 0,96  | -0,19 | -0,85 |       |       |       |       |       |       |       |       |       |       |       |       |       |                   |
| bio8  | 0,83  | 0,42  | 0,46  | -0,35 | 0,91  | 0,71  | -0,28 |       |       |       |       |       |       |       |       |       |       |       |       |                   |
| bio9  | 0,90  | 0,40  | 0,68  | -0,77 | 0,68  | 0,90  | -0,72 | 0,67  |       |       |       |       |       |       |       |       |       |       |       |                   |
| bio10 | 0,86  | 0,41  | 0,45  | -0,33 | 0,99  | 0,73  | -0,27 | 0,93  | 0,72  |       |       |       |       |       |       |       |       |       |       |                   |
| bio11 | 0,96  | 0,49  | 0,82  | -0,89 | 0,66  | 0,99  | -0,85 | 0,70  | 0,90  | 0,72  |       |       |       |       |       |       |       |       |       |                   |
| bio12 | 0,24  | 0,25  | 0,44  | -0,45 | -0,07 | 0,27  | -0,41 | -0,01 | 0,20  | 0,00  | 0,31  |       |       |       |       |       |       |       |       |                   |
| bio13 | 0,11  | 0,39  | 0,45  | -0,37 | -0,22 | 0,08  | -0,27 | -0,10 | 0,02  | -0,14 | 0,17  | 0,88  |       |       |       |       |       |       |       |                   |
| bio14 | 0,34  | -0,11 | 0,15  | -0,31 | 0,30  | 0,46  | -0,39 | 0,22  | 0,39  | 0,30  | 0,39  | 0,48  | 0,04  |       |       |       |       |       |       |                   |
| bio15 | -0,14 | 0,44  | 0,23  | 0,00  | -0,29 | -0,27 | 0,15  | -0,18 | -0,24 | -0,25 | -0,15 | -0,07 | 0,37  | -0,84 |       |       |       |       |       |                   |
| bio16 | 0,11  | 0,36  | 0,44  | -0,38 | -0,24 | 0,08  | -0,28 | -0,13 | 0,03  | -0,16 | 0,17  | 0,90  | 1,00  | 0,07  | 0,34  |       |       |       |       |                   |
| bio17 | 0,36  | -0,09 | 0,16  | -0,32 | 0,32  | 0,47  | -0,39 | 0,24  | 0,40  | 0,32  | 0,40  | 0,50  | 0,07  | 1,00  | -0,83 | 0,09  |       |       |       |                   |
| bio18 | 0,10  | 0,36  | 0,44  | -0,38 | -0,25 | 0,08  | -0,29 | -0,13 | 0,02  | -0,17 | 0,17  | 0,89  | 1,00  | 0,07  | 0,34  | 1,00  | 0,09  |       |       |                   |
| bio19 | 0,36  | -0,07 | 0,12  | -0,27 | 0,36  | 0,43  | -0,31 | 0,26  | 0,47  | 0,35  | 0,37  | 0,43  | 0,00  | 0,93  | -0,80 | 0,03  | 0,94  | 0,03  |       |                   |

|                      |       |       |      |       |       |       |       |       |       |       |       |      |      |       |      |      |       |      |       |      |
|----------------------|-------|-------|------|-------|-------|-------|-------|-------|-------|-------|-------|------|------|-------|------|------|-------|------|-------|------|
| $h_{\text{mean}}$    | -0,17 | 0,30  | 0,36 | -0,31 | -0,60 | -0,15 | -0,23 | -0,48 | -0,12 | -0,54 | -0,06 | 0,52 | 0,70 | -0,24 | 0,58 | 0,72 | -0,24 | 0,71 | -0,26 |      |
| $h_{\text{max-min}}$ | 0,09  | -0,04 | 0,24 | -0,34 | -0,22 | 0,18  | -0,40 | -0,15 | 0,12  | -0,16 | 0,18  | 0,38 | 0,33 | 0,03  | 0,10 | 0,36 | 0,03  | 0,34 | -0,01 | 0,48 |

Note: If two variables had  $r > \pm 0.8$ , only one of them was selected in the same model;
